# Supplementary material for: Long-term platinum-based drug accumulation in cancer-associated fibroblasts promotes colorectal cancer progression and resistance to therapy
Source: PubMed Central journal article supplement (PMC9918738; doi:10.1038/s41467-023-36334-1), 2023-02-10
Supplement: 41467_2023_36334_MOESM3_ESM.pdf [file 41467_2023_36334_MOESM3_ESM.pdf]

## **Description of Additional Supplementary Files**

**Supplementary Data 1:** Gene signatures
