# Supplementary material for: Long-term platinum-based drug accumulation in cancer-associated fibroblasts promotes colorectal cancer progression and resistance to therapy
Source: PubMed Central journal article supplement (PMC9918738; doi:10.1038/s41467-023-36334-1), 2023-02-10
Supplement: 41467_2023_36334_MOESM5_ESM.pdf [file 41467_2023_36334_MOESM5_ESM.pdf]

## Reporting Summary

Nature Portfolio wishes to improve the reproducibility of the work that we publish. This form provides structure for consistency and transparency in reporting. For further information on Nature Portfolio policies, see our [Editorial Policies](#) and the [Editorial Policy Checklist](#).

### Statistics

For all statistical analyses, confirm that the following items are present in the figure legend, table legend, main text, or Methods section.

n/a Confirmed

- |                                     |                                     |                                                                                                                                                                                                                                                            |
|-------------------------------------|-------------------------------------|------------------------------------------------------------------------------------------------------------------------------------------------------------------------------------------------------------------------------------------------------------|
| <input type="checkbox"/>            | <input checked="" type="checkbox"/> | The exact sample size ( $n$ ) for each experimental group/condition, given as a discrete number and unit of measurement                                                                                                                                    |
| <input type="checkbox"/>            | <input checked="" type="checkbox"/> | A statement on whether measurements were taken from distinct samples or whether the same sample was measured repeatedly                                                                                                                                    |
| <input type="checkbox"/>            | <input checked="" type="checkbox"/> | The statistical test(s) used AND whether they are one- or two-sided<br><i>Only common tests should be described solely by name; describe more complex techniques in the Methods section.</i>                                                               |
| <input type="checkbox"/>            | <input checked="" type="checkbox"/> | A description of all covariates tested                                                                                                                                                                                                                     |
| <input checked="" type="checkbox"/> | <input type="checkbox"/>            | A description of any assumptions or corrections, such as tests of normality and adjustment for multiple comparisons                                                                                                                                        |
| <input type="checkbox"/>            | <input checked="" type="checkbox"/> | A full description of the statistical parameters including central tendency (e.g. means) or other basic estimates (e.g. regression coefficient) AND variation (e.g. standard deviation) or associated estimates of uncertainty (e.g. confidence intervals) |
| <input type="checkbox"/>            | <input checked="" type="checkbox"/> | For null hypothesis testing, the test statistic (e.g. $F$ , $t$ , $r$ ) with confidence intervals, effect sizes, degrees of freedom and $P$ value noted<br><i>Give <math>P</math> values as exact values whenever suitable.</i>                            |
| <input checked="" type="checkbox"/> | <input type="checkbox"/>            | For Bayesian analysis, information on the choice of priors and Markov chain Monte Carlo settings                                                                                                                                                           |
| <input checked="" type="checkbox"/> | <input type="checkbox"/>            | For hierarchical and complex designs, identification of the appropriate level for tests and full reporting of outcomes                                                                                                                                     |
| <input checked="" type="checkbox"/> | <input type="checkbox"/>            | Estimates of effect sizes (e.g. Cohen's $d$ , Pearson's $r$ ), indicating how they were calculated                                                                                                                                                         |

Our web collection on [statistics for biologists](#) contains articles on many of the points above.

### Software and code

Policy information about [availability of computer code](#)

Data collection SDS v.2.4

Data analysis CMSclassifier v.1.0.0, Survival v.3.5-0 and Survminer v.0.4.9 packages in R v.3.5.1, g:Profiler v.2020-10-12, GSEA v.4.1.0, Graphpad Prism v.8.0.1, ImageJ v.1.53i, TAC v.4.0, Origin v.9.5, ssGSEA v.10.0.12, Qupath v.0.3.2

For manuscripts utilizing custom algorithms or software that are central to the research but not yet described in published literature, software must be made available to editors and reviewers. We strongly encourage code deposition in a community repository (e.g. GitHub). See the Nature Portfolio [guidelines for submitting code & software](#) for further information.

### Data

Policy information about [availability of data](#)

All manuscripts must include a [data availability statement](#). This statement should provide the following information, where applicable:

- Accession codes, unique identifiers, or web links for publicly available datasets
- A description of any restrictions on data availability
- For clinical datasets or third party data, please ensure that the statement adheres to our [policy](#)

All data are available in the main text and supplementary material. Source data are provided with this paper. The transcriptomic datasets generated for this study have been deposited in NCBI GEO repository under the accession numbers GSE181020 and GSE181026. Hallmarks gene signatures were obtained from the Broad Institute data base (<https://www.gsea-msigdb.org/>). Publically available merged expression data were obtained from Synapse repository (doi:10.7303/syn2623706). GSE39396, GSE17536, GSE39582, GSE72970 and GSE14333 datasets used in this study are publicly available in the NCBI GEO database.

https://www.ncbi.nlm.nih.gov/geo/query/acc.cgi?acc=GSE181020  
 https://www.ncbi.nlm.nih.gov/geo/query/acc.cgi?acc=GSE181026  
 https://www.ncbi.nlm.nih.gov/geo/query/acc.cgi?acc=GSE17536  
 https://www.ncbi.nlm.nih.gov/geo/query/acc.cgi?acc=GSE39582  
 https://www.ncbi.nlm.nih.gov/geo/query/acc.cgi?acc=GSE72970  
 https://www.ncbi.nlm.nih.gov/geo/query/acc.cgi?acc=GSE14333  
 https://www.ncbi.nlm.nih.gov/geo/query/acc.cgi?acc=GSE39396

## Human research participants

Policy information about [studies involving human research participants and Sex and Gender in Research.](#)

|                             |                                                                                                                                                                                                                                                                                                                                                                                                                                                                                                                                                                                                                                                                                                                                                                                                                                                                                                                                                                                                                                                                                                                   |
|-----------------------------|-------------------------------------------------------------------------------------------------------------------------------------------------------------------------------------------------------------------------------------------------------------------------------------------------------------------------------------------------------------------------------------------------------------------------------------------------------------------------------------------------------------------------------------------------------------------------------------------------------------------------------------------------------------------------------------------------------------------------------------------------------------------------------------------------------------------------------------------------------------------------------------------------------------------------------------------------------------------------------------------------------------------------------------------------------------------------------------------------------------------|
| Reporting on sex and gender | There was no sex and gender analysis in this study                                                                                                                                                                                                                                                                                                                                                                                                                                                                                                                                                                                                                                                                                                                                                                                                                                                                                                                                                                                                                                                                |
| Population characteristics  | Tumor samples from colorectal cancer patients                                                                                                                                                                                                                                                                                                                                                                                                                                                                                                                                                                                                                                                                                                                                                                                                                                                                                                                                                                                                                                                                     |
| Recruitment                 | Biological samples and clinical data were obtained under patient informed consent and approval of Clinical Research Ethics Committees (CEIC; 2016/6958/l, 2020/9113/l, 2020/9038/l) Parc de Salut MAR Biobank, IMIM, Spain. Informed consent authorizes the use of clinical information and biological surplus from diagnostic or therapeutic procedures for biomedical research projects. Samples were collected within the usual clinical practice and were utilized in this study per availability. There was no active recruitment of patients for this study. There was no participant compensation. Clinical information was anonymized by medical doctors collaborating to the project. International standards of Ethical Principles for Medical Research Involving Human subjects (code of ethics, Declaration of Helsinki, Fortaleza, Brazil, October 2013) were followed in accordance with legal regulations on data confidentiality (Organic Law 3/2018 -December the 5th- on the Protection of Personal Data and Digital Rights Guarantee) and on biomedical research (Law 14/2007 -July the 3rd-). |
| Ethics oversight            | Clinical Research Ethics Committee (CEIC) Parc de Salut Mar                                                                                                                                                                                                                                                                                                                                                                                                                                                                                                                                                                                                                                                                                                                                                                                                                                                                                                                                                                                                                                                       |

Note that full information on the approval of the study protocol must also be provided in the manuscript.

## Field-specific reporting

Please select the one below that is the best fit for your research. If you are not sure, read the appropriate sections before making your selection.

Life sciences       Behavioural & social sciences       Ecological, evolutionary & environmental sciences

For a reference copy of the document with all sections, see [nature.com/documents/nr-reporting-summary-flat.pdf](https://www.nature.com/documents/nr-reporting-summary-flat.pdf)

## Life sciences study design

All studies must disclose on these points even when the disclosure is negative.

|                 |                                                                                                                                                                                                                                                                                                                                                                                               |
|-----------------|-----------------------------------------------------------------------------------------------------------------------------------------------------------------------------------------------------------------------------------------------------------------------------------------------------------------------------------------------------------------------------------------------|
| Sample size     | Sample size was chosen following previous experience in the assessment of experimental variability (Tauriello et al, 2018, PMID: 29443964; Calon et al. 2015, PMID: 25706628).                                                                                                                                                                                                                |
| Data exclusions | No data was excluded from the analysis.                                                                                                                                                                                                                                                                                                                                                       |
| Replication     | Generally, all measurements were performed with n>= 3 biological replicates. All attempts at replication were successful.                                                                                                                                                                                                                                                                     |
| Randomization   | For in vitro and ex vivo studies, samples were randomly assigned to treatment groups. For in vivo studies, animals were randomly assigned to experimental groups.                                                                                                                                                                                                                             |
| Blinding        | The investigators were blinded to group allocation and data collection for in vivo experiments. In vivo data analysis was not blinded to enable investigators to perform corresponding data interpretation. No blinding was applied to ex vivo/in vitro experiments analysis as each investigator performing a given experiment labeled the corresponding samples and performed the analysis. |

## Reporting for specific materials, systems and methods

We require information from authors about some types of materials, experimental systems and methods used in many studies. Here, indicate whether each material, system or method listed is relevant to your study. If you are not sure if a list item applies to your research, read the appropriate section before selecting a response.

## Materials &amp; experimental systems

| n/a                                 | Involvement                                                     |
|-------------------------------------|-----------------------------------------------------------------|
| <input type="checkbox"/>            | <input checked="" type="checkbox"/> Antibodies                  |
| <input type="checkbox"/>            | <input checked="" type="checkbox"/> Eukaryotic cell lines       |
| <input checked="" type="checkbox"/> | <input type="checkbox"/> Palaeontology and archaeology          |
| <input type="checkbox"/>            | <input checked="" type="checkbox"/> Animals and other organisms |
| <input checked="" type="checkbox"/> | <input type="checkbox"/> Clinical data                          |
| <input checked="" type="checkbox"/> | <input type="checkbox"/> Dual use research of concern           |

## Methods

| n/a                                 | Involvement                                     |
|-------------------------------------|-------------------------------------------------|
| <input checked="" type="checkbox"/> | <input type="checkbox"/> ChIP-seq               |
| <input checked="" type="checkbox"/> | <input type="checkbox"/> Flow cytometry         |
| <input checked="" type="checkbox"/> | <input type="checkbox"/> MRI-based neuroimaging |

## Antibodies

## Antibodies used

Anti- $\beta$ -ACTIN Mouse monoclonal A5316/AC-74 Sigma-Aldrich  
 Anti-FAP Rat monoclonal MABS1002/D28 Vitatex  
 Anti-POSTN Rabbit polyclonal HPA012306 Sigma  
 Anti- $\alpha$ -SMA Mouse monoclonal MU128-UC/1A4 Biogenex  
 Anti-P-STAT3 Rabbit polyclonal 9145S Cell Signalling  
 Anti-CD45 Mouse monoclonal IS751/2B11 Dako  
 Anti-P-SMAD3 Rabbit polyclonal ab52903 Abcam  
 Anri-CD31 Rabbit polyclonal ab28364 Abcam  
 Anti-IL11 Rabbit polyclonal sc7924 Santa Cruz  
 Envision Anti-Mouse HRP Goat IgG K4001 Dako  
 ImmPRESS Anti-Rabbit HRP Goat IgG MP-7451 Vector laboratories  
 Anti-Rat Biotin Donkey IgG 712-065-153 Jackson Immuno Research

## Validation

Antibody Reference /PMID  
 Anti- $\beta$ -ACTIN /15781629  
 Anti-FAP /25706628  
 Anti-POSTN /25706628  
 Anti- $\alpha$ -SMA /23153532  
 Anti-P-STAT3 /23153532  
 Anti-CD45 /21468583  
 Anti-P-SMAD3 /35344216  
 Anri-CD31 /23153532  
 Anti-IL11 /23948300  
 Envision Anti-Mouse/36528681  
 ImmPRESS Anti-Rabbit/36595909  
 Anti-Rat Biotin/36514181

## Eukaryotic cell lines

Policy information about [cell lines and Sex and Gender in Research](#)

## Cell line source(s)

Mouse tumor organoids (MTOs) were derived from genetic models in our lab and are described in Tauriello et al. Nature 2018. Patient-derived organoids (PDOs) were derived from patient samples in our lab and are described in Calon et al. Nature Genetics 2015. Primary fibroblasts were derived from CRC patient minced tumor tissue samples as described in Methods. HUVEC (CRL-1730) and CCD-18Co (CRL-1459) were provided by the American Type Culture Collection (ATCC, USA). HT29-M6 cells were provided by the Cancer Cell Line Repository (CCLR) from MARBiobanc (Spain).

## Authentication

Authentication was performed by RT-qPCR with relevant markers (e.g. FAP, EpCAM) and genotyping using specific primers for key mutations.

## Mycoplasma contamination

Cell lines were tested bi-monthly for mycoplasma contamination and resulted negative.

Commonly misidentified lines  
(See [ICLAC](#) register)

No commonly misidentified lines were used in this study.

## Animals and other research organisms

Policy information about [studies involving animals; ARRIVE guidelines](#) recommended for reporting animal research, and [Sex and Gender in Research](#)

## Laboratory animals

Experiments were performed in 5 to 6 weeks old NSG NOD.Cg-Prkdcscid Il2rgtm1Wjl/SzJ (Strain #:005557) or nude NU/J (Strain #:002019) female mice from Jackson Laboratories and in 7-9 weeks old C57BL/6J (strain #:C57BL/6JRj) female mice from Janvier Labs. Animals were maintained in specific pathogen-free conditions with controlled temperature/humidity (22°C/55%) environment on a

12-h light-dark cycle and with standard diet and water ad libitum. The general condition of animals was monitored using animal fitness and weight controls by authors, facility technicians and by an external veterinary scientist responsible for animal welfare.

Wild animals

No wild animals where used in this study

Reporting on sex

No sex based analysis was performed

Field-collected samples

No field-collected samples where used in this study

Ethics oversight

Experiments were approved by the Animal Research Ethical Committee of Barcelona Biomedical Research Park and the Catalan government (CEEA-PRBB; FUE-2018-00801894).

Note that full information on the approval of the study protocol must also be provided in the manuscript.
